# Supplementary material
Source: PubMed Central journal article supplement (PMC4621768)

**Figure S4 (Related Figure 4)**

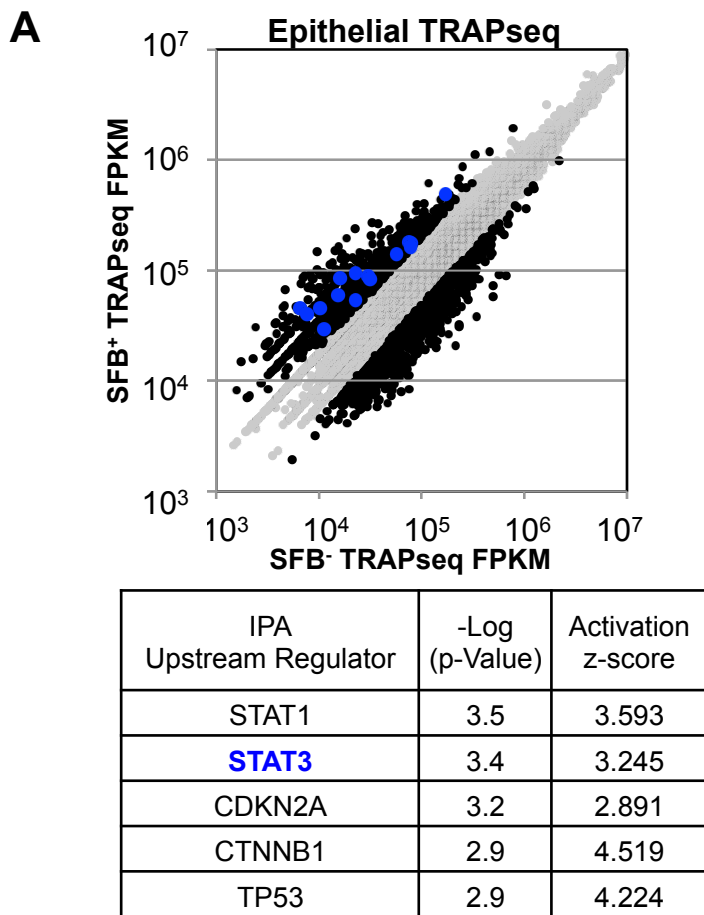

| gene_id          | SFB- FPKM | SFB+ FPKM |
|------------------|-----------|-----------|
| <b>Saa1</b>      | 0         | 116550    |
| <b>Ctf1</b>      | 0         | 50284     |
| <b>Tnf</b>       | 0         | 41546     |
| <b>Eomes</b>     | 0         | 27112     |
| <b>Il23a</b>     | 0         | 24874     |
| <b>Mnda</b>      | 0         | 20345     |
| <b>Igfbp5</b>    | 0         | 16859     |
| <b>Tnfsf11</b>   | 0         | 14915     |
| <b>Pgr</b>       | 0         | 4770      |
| <b>Cxcl9</b>     | 6480      | 45674     |
| <b>Areg</b>      | 16075     | 84985     |
| <b>Il7</b>       | 7627      | 40322     |
| <b>Cd274</b>     | 10314     | 45439     |
| <b>Tnfrsf1b</b>  | 22834     | 93892     |
| <b>Sln5</b>      | 15583     | 60413     |
| <b>Fasl</b>      | 30177     | 88631     |
| <b>Serpina3k</b> | 173070    | 487986    |
| <b>Socs1</b>     | 31602     | 83534     |
| <b>Il6ra</b>     | 11237     | 29703     |
| <b>Sln2</b>      | 57262     | 141273    |
| <b>Gbp2</b>      | 23071     | 54209     |
| <b>Rab27a</b>    | 75999     | 178572    |
| <b>H2-Q6</b>     | 79308     | 174700    |
| <b>Itgb2</b>     | 78942     | 162301    |

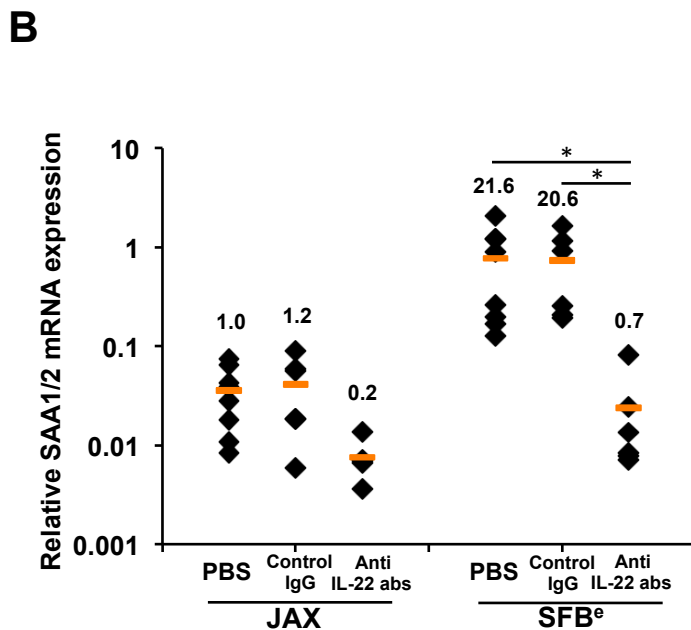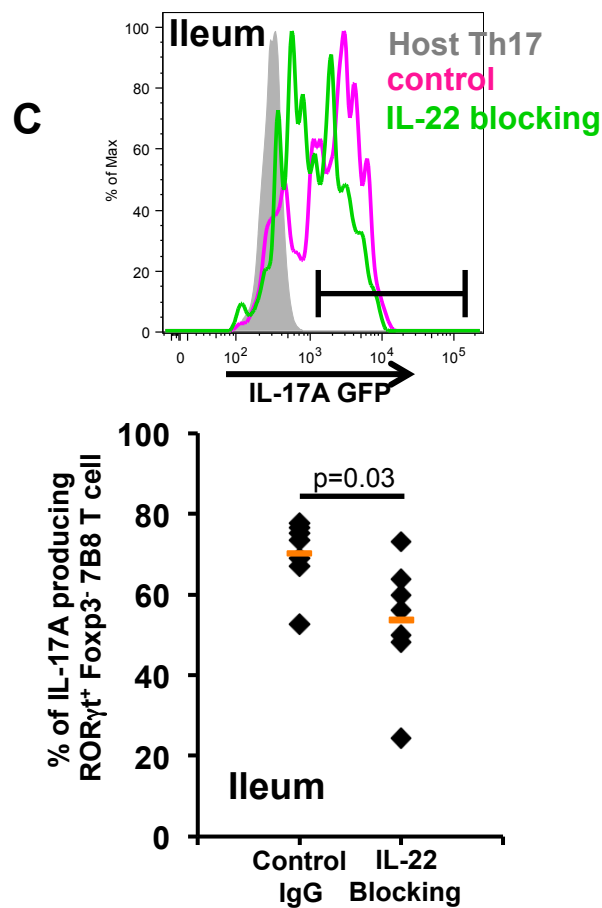

Supplement: NIHMS725831-supplement-4.pdf [file NIHMS725831-supplement-4.pdf]
