# Supplementary material
Source: PubMed Central journal article supplement (PMC4621768)
Supplement: NIHMS725831-supplement-8.pdf [file NIHMS725831-supplement-8.pdf]

## **Supplemental EXPERIMENTAL PROCEDURES**

### **Confirmation of SFB Colonization**

Genomic DNA was purified from 1-2 mm terminal ileum or fresh fecal pellets by phenol-chloroform extraction and dissolved with TE buffer containing 100 ng/ml of RNase A. SFB-specific 16S was detected by real-time qPCR. To normalize SFB copy number, universal 16S and/or host genomic DNA (*mll-23r* locus) was also detected by real-time qPCR. Copy numbers were calculated with plasmid standards.

### **Isolation of Lamina Propria Lymphocytes and Epithelial Cells**

Mesenteric fat tissue and Peyer's patches were carefully removed from intestinal tissues. The proximal 1/3 and distal 1/3 of small intestine were designated as duodenum and ileum, respectively. Tissues were incubated in 5 mM EDTA in PBS containing 1 mM of DTT for 20 min at 37°C with rotation (200 rpm). EDTA-DTT washes were pelleted to enrich for intestinal epithelial cells. Remaining tissues were incubated in a second EDTA wash (5 mM EDTA in PBS). Tissues were then further digested (10% fetal calf serum, 1.0 mg/ml each of Collagenase D (Roche) and 100 µg/ml DNase I (Sigma), and 50 U/ml Dispase (Worthington)) at 37°C for 30 min. Digested tissues were then passed through a 70 µm cell strainer. Mononuclear cells were enriched by 40:80 Percoll gradient. Lamina propria (LP) lymphocytes were collected from the Percoll gradient interphase.

RNA was prepared using Trizole (Invitrogen) or RNA easy kit (Qiagen) following manufacturer protocols.

### **Cell Staining for Flow Cytometry**

Live-dead labeling with DAPI (Sigma) and/or Aqua (Invitrogen) was performed and only live cells were analyzed. Fixed cells were permeabilized using Permeabilization buffer (eBiosciences) and further stained with anti-Foxp3, anti-ROR $\gamma$ t and anti-GFP using the Foxp3 staining buffer set (eBiosciences). For analysis of ILC3s, live LP cells were stained with anti-NK1.1, anti-Klrg1, anti-Klrb1b (clone 2D12, subclone from 2D9) as previously described (Aust et al., 2009), anti-CD4, anti-Sca-1, anti-NKp46 and anti-CCR6. Anti-CD11b, anti-CD14, anti-CD19, anti-B220, anti-TCR $\beta$ , anti-TCR $\gamma\delta$ , and anti-CD3 were used as dump gate.

To detect IL-22 from Th17 cells and ILC3s, isolated LP cells were incubated with or without 50 ng/ml phorbol myristate acetate (PMA) (Sigma), 500 ng/ml Ionomycin (Sigma) in the presence of GolgiSTOP (BD Biosciences) in complete media at 37°C for four hours. Cells were stained with anti-TCR $\gamma\delta$ , anti-TCR $\beta$ , anti-CD3, anti-CD4, anti-NKp46 and anti-CCR6. Anti-CD11b, anti-CD14, anti-CD19, anti-B220 were also used as dump gate. Cells were further stained intracellularly with anti-Foxp3, anti-ROR $\gamma$ t and anti-IL-22 using the Foxp3 staining buffer set. Flow cytometric analysis was performed on an LSRII (BD Biosciences) or an Aria (BD Biosciences). All data were re-analyzed using FlowJo (Tree Star). MHC class II tetramers with a bound immunodominant SFB antigen were

previously described (Yang et al., 2014). Commercially available antibodies used in flow cytometry experiments above are listed in Supplementary Table 1.

## **RNA FISH**

Intestinal tissues were prepared as Swiss rolls, and placed directly into Methacarn fixation buffer (60% absolute methanol, 30% chloroform, 10% glacial acetic acid) overnight at 4°C. Tissues were washed 3 times in 70% ethanol.

Tissues were embedded with paraffin and processed into 5 µm sections. Tissue sections were deparaffinized in 2 changes of xylene. Tissues were then rehydrated in successive ethanol washes (95% and 90%). Following the final rehydration in ddH<sub>2</sub>O, tissues were treated with warm (56°C) hybridization buffer (0.9 M NaCl, 20 mM Tris-HCl pH 7.2, 0.1% SDS) with 500 nM SFB probe and 250 nM 16S probe (described in primer information panel). Tissues were placed into sealed, humidifying chamber and incubated in humidifier overnight at 50°C. Tissues were washed 2 times in warm (56°C) wash buffer (0.9 M NaCl, 20 mM Tris-HCl pH 7.2) for 10 min, stained with 1 mg/ml DAPI for 15 min and washed twice in wash buffer for 10 min. Slides were dried and mounted with Prolong Gold Antifade Reagent (Life technologies). Images were taken on a Zeiss 710 confocal microscope.

## **RNAseq Analysis**

Naïve sorted CD4<sup>+</sup> T cells were cultured in 20 ng/ml IL-6 and 0.1 ng/ml TGF-β for 48h in the presence or absence of 2 µg/ml rmSAA1 before collection of RNA.

RNAseq libraries were prepared and sequenced by the Illumina RapidRun at the Genome Services Laboratory, HudsonAlpha. RNAseq data from two biological replicates were mapped to mm10 genome by Tophat2.0 and compared using CuffDiff with biased correction. Genes significantly up or downregulated more than two-fold with p-value<0.05 were considered significantly affected by mSAA1 treatment in vitro. Ingenuity Pathway Analysis was used to identify upstream regulators for the SAA-affected gene set.

For comparison of Th17 cells and ILC3 expression profiles, *Il17a<sup>gfp/gfp</sup>* and *Il23r<sup>gfp/+</sup>* reporter animals stably colonized with SFB were used to sort CD3<sup>+</sup>CD4<sup>+</sup>IL-17AGFP<sup>+</sup> Th17 cells and CD3<sup>-</sup>CD4<sup>-</sup>IL-23RGFP<sup>+</sup> ILC3 respectively. RNAseq libraries were prepared and sequenced. Normalized DESeq reads were used for data analysis. RNAseq datasets are available on GEO (GSE70599).

### **Ribosome TRAP Analysis**

*EF1-lox-stop-lox-GFP-L10* animals were crossed to epithelial specific (*Villin-Cre*), T cell specific (*Cd4-Cre*), myeloid cell specific (*Cd11c-Cre*), or liver cell specific (*Albumin-Cre*) transgenic lines to express the EGFP-L10a protein in the respective cell populations (Stanley et al., 2013). Epithelial or lamina propria cell extracts were subject to anti-ribosome IP using 2 µg anti-GFP antibodies (Invitrogen) and harvested in Protein G magnetic Dyna beads (Invitrogen) as described previously (Heiman et al., 2014). Complementary DNAs (cDNAs) were synthesized from TRIzol (Invitrogen)-isolated RNA, using Superscript III (Invitrogen). RNAseq libraries were prepared and sequenced by the Illumina

RapidRun at the Genome Services Laboratory, HudsonAlpha. Sequencing reads were mapped by Tophat and transcript levels were determined by Cufflinks. Ingenuity Pathway Analysis was used to identify the enriched upstream signaling pathways for mRNAs with increased ribosomal association in response to SFB colonization. TRAPseq datasets are available on GEO (GSE70599).

### **IL-22 Blockade**

Mice were injected with mIL-22-specific mAb (clone 8E11; Genentech) at a dose of 150  $\mu$ g per mouse intraperitoneally every other day starting at day one prior to introduction of SFB, as previously reported (Zheng et al., 2008). Control groups received isotype control IgG1 mAb (Genentech). Four days after gavage, total RNA from the ileum epithelial fraction was purified to evaluate SAA1/2 mRNA transcripts by qRT-PCR. Three days after SFB<sup>e</sup> gavage, 5,000 naïve T cells from IL-17A-GFP reporter 7B8 Tg mice were adoptively transferred and IL-17A producing cells were detected among Foxp3<sup>-</sup> ROR $\gamma$ t<sup>+</sup> transferred 7B8 T cells.

### **Organoid Culture**

Organoid isolation was performed as described (Sato and Clevers, 2013). Briefly, crypts were collected by incubation with 5 mM EDTA in PBS. Isolated crypts were re-suspended with Matrigel (Invitrogen) and plated onto 24-well plates with Advanced DMEM/F12 media (Invitrogen) with 1x N2 supplement (Invitrogen), 1x B27 supplement (Invitrogen), 1 mM N-Acetylcysteine (Sigma), 100 ng/ml of mNoggin (Peprotech), 50 ng/ml mEGF (Invitrogen), and 1  $\mu$ g/ml hR-Spondin

(R&D) (complete organoid culture medium). Five or seven days after plating, budding organoids were treated with various concentrations of rIL-22 (Peprotech) or PBS in complete crypt culture medium for two or six hours. Total RNA was purified to evaluate SAA1/2 mRNA transcripts by real-time qPCR.

### **SFB-specific Transgenic T Cell Transfer**

Five thousand naïve ( $CD4^+$ ,  $CD62L^{hi}$ ,  $CD44^{low}$ ,  $CD25^-$ ,  $TCRV\beta14^+$ ) T cells were isolated from murine spleen and lymph nodes of 7B8 TCR Tg mice on the Ly5.1 background by FACS sorting. Sorted naïve T cells were stained with CellTrace CFSE Cell Proliferation kit (Life Technology) to follow cell division, and administered into each congenic Ly5.2 recipient mouse by retro-orbital injection. Animals were sacrificed on day four or seven, and lamina propria mononuclear cells from MLN and ileum were harvested as described (Yang et al., 2014). Ex vivo restimulation was performed for five hours in the presence of 500 ng/mL PMA, 500 ng/mL Ionomycin and GolgiStop. For 7B8-IL17A-IRES-GFP transfer experiments, cells were fixed in Foxp3 staining buffer from eBioscience and stained for CD45.1,  $TCRV\beta14$ ,  $ROR\gamma t$ , Foxp3, and anti-GFP-Alexa488 antibodies.

### **Mouse and Human T Helper Cell Culture**

Mouse naïve T cells were purified from lymph nodes and spleens of six to eight week old C57BL/6 mice by sorting  $DAPI^-$ ,  $CD8^-$ ,  $CD19^-$ ,  $CD4^+$ ,  $CD25^-$ ,  $CD62L^+$ ,  $CD44^{low/int}$  on a FACSAria (BD Biosciences). Cells were cultured in IMDM (Sigma) supplemented with 10% heat-inactivated FBS (Hyclone), 50 U penicillin-

streptomycin (Invitrogen), 2 mM glutamine, and 50  $\mu$ M  $\beta$ -mercaptoethanol. For T cell polarization, 200  $\mu$ l cells were seeded at  $0.3 \times 10^5$  cells per mL in 96-well plates pre-coated with 5  $\mu$ g/mL anti-CD3 $\epsilon$  (eBioscience, 145-2C11) and 10  $\mu$ g/mL anti-CD28 (eBioscience, clone 37.51). Cells were cultured for five days in either suboptimal Th17 conditions (0 - 0.1 ng/mL TGF- $\beta$  (Peprotech), 20 ng/mL IL-6 (Peprotech)), Th1 conditions (10 ng/mL IL-12 (Peprotech), 10 U/mL IL-2 (Peprotech), and 2 ng/mL anti-IL-4 (eBiosciences)), or Th0 conditions (10 U/mL IL-2). For cytokine analysis, cells were incubated for five hours with 50 ng/mL PMA, 500 ng/mL ionomycin and GolgiStop. LSR II (BD Biosciences) and FlowJo software were used for flow cytometry and analysis. Dead cells were excluded using the Live/Dead fixable aqua dead cell stain kit (Invitrogen). Human T cells were isolated from peripheral blood of healthy donors using anti-human CD4 MACS beads (Miltenyi). Th17 polarizing conditions were previously described (Manel et al., 2008). Human CD4 T cells were cultured in 96-well U bottom plates in 10 U/ml of IL-2, 10 ng/mL of IL-1 $\beta$ , 10 ng/ml of IL-23, 1  $\mu$ g/ml of anti-IL-4, 1  $\mu$ g/mL of anti-IFN $\gamma$  and anti-CD3/CD28 activation beads (LifeTechnologies) at a ratio of 1 bead per cell. Recombinant mouse SAA1 and human SAA1 were purchased from R&D and Peprotech, respectively, and resuspended in 0.1% BSA PBS and were used in in vitro T helper cell cultures. Anti-human SAA antibodies were purchased from Abcam (Clone 115) and used at 5  $\mu$ g/ml in human Th17 in vitro culture assays. Wildtype naïve mouse CD4<sup>+</sup> T cells were cultured in Th17 polarizing condition with the addition of 2  $\mu$ g/ml rmSAA1 at 0h or

24h in the presence or absence of 2  $\mu\text{g/ml}$  monoclonal rabbit anti-mouse SAA antibodies (LifeTechnology, 700830).

### **ROR $\gamma$ t Transcriptional Activity in Polarized Th17 Cells**

Murine Th17 cells were cultured for 48h in the presence or absence of 2  $\mu\text{g/ml}$  rmSAA. One  $\mu\text{g}$  RORE-Firefly luciferase reporter construct and one  $\mu\text{g}$  control renilla construct were introduced into cultured Th17 cells using the Amaxa Nucleofector 4D (Lonza) according to the manufacturer's instructions. Luciferase activity was measured using the dual luciferase reporter kit (Promega) at 24h after transfection. Relative luciferase units (RLU) were calculated as a function of Firefly luciferase reads over those of renilla luciferase.

### **Immunofluorescence Microscopy**

Terminal ileum from SFB<sup>e</sup>- or JAX-gavaged mice were Swiss-rolled, fixed for four hours in 4% paraformaldehyde, incubated overnight in 30% sucrose, and frozen in OCT. Tissue was cut into five  $\mu\text{M}$  sections, blocked in TBS-T+G (0.3% Triton X-100, 5% Normal goat serum), and incubated overnight in primary antibody (anti-mouse CD326/EpCAM-APC, clone G8.8; eBioscience, and anti-mouse P-Stat3 (Y705), clone D3A7; Cell Signaling) in TBS-T+G. Tissue was washed and incubated with Alexa Fluor 488 Goat anti-Rabbit IgG (H+L) (Molecular Probe) for 1h before DAPI staining. Tissue was imaged using an LSM 710 confocal (Carl Zeiss) and images were processed using ImageJ.



## qRT-PCR

Quantitative RT-PCR was performed using the Hot Start-IT SYBR Green (Afymetrix) on the Roche real-time PCR system (Roche 480). Serial dilutions of plasmid standards were included for each gene to generate a standard curve to allow for calculation of the input amount of cDNA for each gene. For analysis of mRNA transcripts, RNA samples were treated with DNase (Roche) prior to cDNA synthesis to avoid effect of DNA contamination. Gene-specific primers spanning exons were used (table below). Values were normalized to GAPDH for each sample.

## Primer information

| Name                        | Forward                  | Reverse                  |
|-----------------------------|--------------------------|--------------------------|
| bUniF340<br>(Universal 16S) | ACTCCTACGGGAGGCAGCAGT    | ATTACCGCGGCTGCTGGC       |
| bSFB736F<br>(SFB 16S)       | GACGCTGAGGCATGAGAGCAT    | GACGGCACGAATTGTTATTCA    |
| genomic IL23R               | GCAAATGGAAATGTCAGCAGAGCC | GCAGCTCACTTTCAGTAATCTGGG |
| mll17a<br>(mRNA)            | TTTAACTCCCTTGGCGCAAAA    | CTTCCCTCCGCATTGACAC      |
| mll17f<br>(mRNA)            | TCCCCTGGAGGATAACACTG     | GGGGTCTCGAGTGATGTTGT     |
| mll22<br>(mRNA)             | CCGAGGAGTCAGTGCTAAGG     | CATGTAGGGCTGGAACCTGT     |

|                                |                         |                       |
|--------------------------------|-------------------------|-----------------------|
| mIi23R<br>(mRNA)               | AGAGACACTGATTTGTGGGAAAG | GTTCCAGGTGCATGTCATGTT |
| mROR $\gamma$ t<br>(mRNA)      | GACAGGGAGCCAAGTTCTCA    | CTTGTCCCCACAGATCTTGCA |
| mSaa1/2<br>(mRNA) <sup>#</sup> | AGTGGCAAAGACCCCAATTA    | GGCAGTCCAGGAGGTCTGTA  |
| mGAPDH<br>(mRNA)               | AATGTGTCCGTCGTGGATCT    | CATCGAAGGTGGAAGAGTGG  |
| mI $\gamma$<br>(mRNA)          | ACAGCAAGGCGAAAAAGGATG   | TGGTGGACCACTCGGATGA   |

<sup>#</sup> Both SAA1 and 2 mRNAs were detected by the same primer set.

| Name           | Sequence              | Modification |
|----------------|-----------------------|--------------|
| SFB FISH probe | GCGAGCTTCCTCATTACAAGG | 5Alex546N/   |

## Antibody Information

| For flow cytometry and cell sorting |              |                       |
|-------------------------------------|--------------|-----------------------|
| Name                                | Clone number | Company               |
| Anti-Mouse CD3e                     | 145-2C11     | eBioscience           |
| Anti-Mouse CD4                      | RM4-5        | eBioscience           |
| Anti-Mouse CD8                      | 53-6.7       | eBioscience           |
| Anti-Mouse CD11b                    | M1/70        | eBioscience           |
| Anti-Mouse CD14                     | 5a2-8        | eBioscience           |
| Anti-Mouse CD16/32 Fc Block         | 2.4G2        | Tonbo                 |
| Anti-Mouse CD19                     | 1D3          | Tonbo                 |
| Anti-Mouse CD25                     | PC61.5       | eBioscience           |
| Anti-Human/Mouse CD44               | 1M7          | eBioscience           |
| Anti-Mouse CD45.1                   | A20          | eBioscience           |
| Anti-Mouse CD45.2                   | 104          | eBioscience           |
| Anti-Mouse CD196 (CCR6)             | 140706       | BD                    |
| Anti-Mouse/Rat IL-17A               | eBio17B7     | eBioscience           |
| Anti-Human IL-17A                   | eBio64DEC17  | eBioscience           |
| Anti-Human CD4                      | OKT4         | eBioscience           |
| Anti-Human IL-17F                   | SHLR17       | eBioscience           |
| Anti-Human/Mouse ROR $\gamma$ t     | AFKJS-9      | eBioscience           |
| Anti-Human/Mouse IL-22              | IL22JOP      | eBioscience           |
| Anti-GFP Alexa 488                  | (Polyclonal) | Molecular Probe       |
| Anti-GFP Biotin                     | 5F12.4       | eBioscience           |
| Anti-Mouse TCRb                     | H57-597      | eBioscience           |
| Anti-Mouse gd TCR                   | eBioGL3      | eBioscience           |
| Anti-Mouse Vb14 TCR                 | 14.2         | BD                    |
| Anti-Mouse NK1.1                    | PK136        | eBioscience           |
| Anti-Mouse CD335 (NKp46)            | 29A1.4       | eBioscience           |
| Anti-Mouse KLRG1                    | 2F1          | eBioscience           |
| Anti-Mouse Ly-6A/E (Sca-1)          | D7           | BioLegend/eBioscience |
| Anti-Mouse MHCII (I-A/I-E)          | M5/114.15.2  | eBioscience           |
| Streptavidin                        |              | eBioscience           |
| Anti-Mouse ROR $\gamma$ t           | B2D          | eBioscience           |
| Anti-Mouse/Rat Foxp3                | FJK-16s      | eBioscience           |
| Anti-Mouse B220                     | RA3-6B2      | eBioscience           |
| Anti-Human/Mouse T-bet              | eBio4B10     | eBioscience           |
| Anti-Human/Mouse GATA-3             | TXAJ         | eBioscience           |
| Anti-Mouse IL-13                    | eBio13A      | eBioscience           |
| Anti-Mouse IL17-F                   | 9D3.1C8      | BioLegend             |
| Anti-Mouse/Rat Ki-67                | SolA15       | eBioscience           |

## References

- Aust, J.G., Gays, F., Mickiewicz, K.M., Buchanan, E., and Brooks, C.G. (2009). The expression and function of the NKRP1 receptor family in C57BL/6 mice. *J Immunol* *183*, 106-116.
- Heiman, M., Kulicke, R., Fenster, R.J., Greengard, P., and Heintz, N. (2014). Cell type-specific mRNA purification by translating ribosome affinity purification (TRAP). *Nature protocols* *9*, 1282-1291.
- Manel, N., Unutmaz, D., and Littman, D.R. (2008). The differentiation of human T(H)-17 cells requires transforming growth factor-beta and induction of the nuclear receptor RORgamma. *Nat Immunol* *9*, 641-649.
- Sato, T., and Clevers, H. (2013). Primary mouse small intestinal epithelial cell cultures. *Methods in molecular biology* *945*, 319-328.
- Stanley, S., Domingos, A.I., Kelly, L., Garfield, A., Damanpour, S., Heisler, L., and Friedman, J. (2013). Profiling of Glucose-Sensing Neurons Reveals that GHRH Neurons Are Activated by Hypoglycemia. *Cell metabolism* *18*, 596-607.
- Yang, Y., Torchinsky, M.B., Gobert, M., Xiong, H., Xu, M., Linehan, J.L., Alonzo, F., Ng, C., Chen, A., Lin, X., *et al.* (2014). Focused specificity of intestinal TH17 cells towards commensal bacterial antigens. *Nature* *510*, 152-156.
- Zheng, Y., Valdez, P.A., Danilenko, D.M., Hu, Y., Sa, S.M., Gong, Q., Abbas, A.R., Modrusan, Z., Ghilardi, N., de Sauvage, F.J., *et al.* (2008). Interleukin-22 mediates early host defense against attaching and effacing bacterial pathogens. *Nat Med* *14*, 282-289.
