# Supplementary material
Source: PubMed Central journal article supplement (PMC4621768)

**Figure S1 (Related Figure 1)**

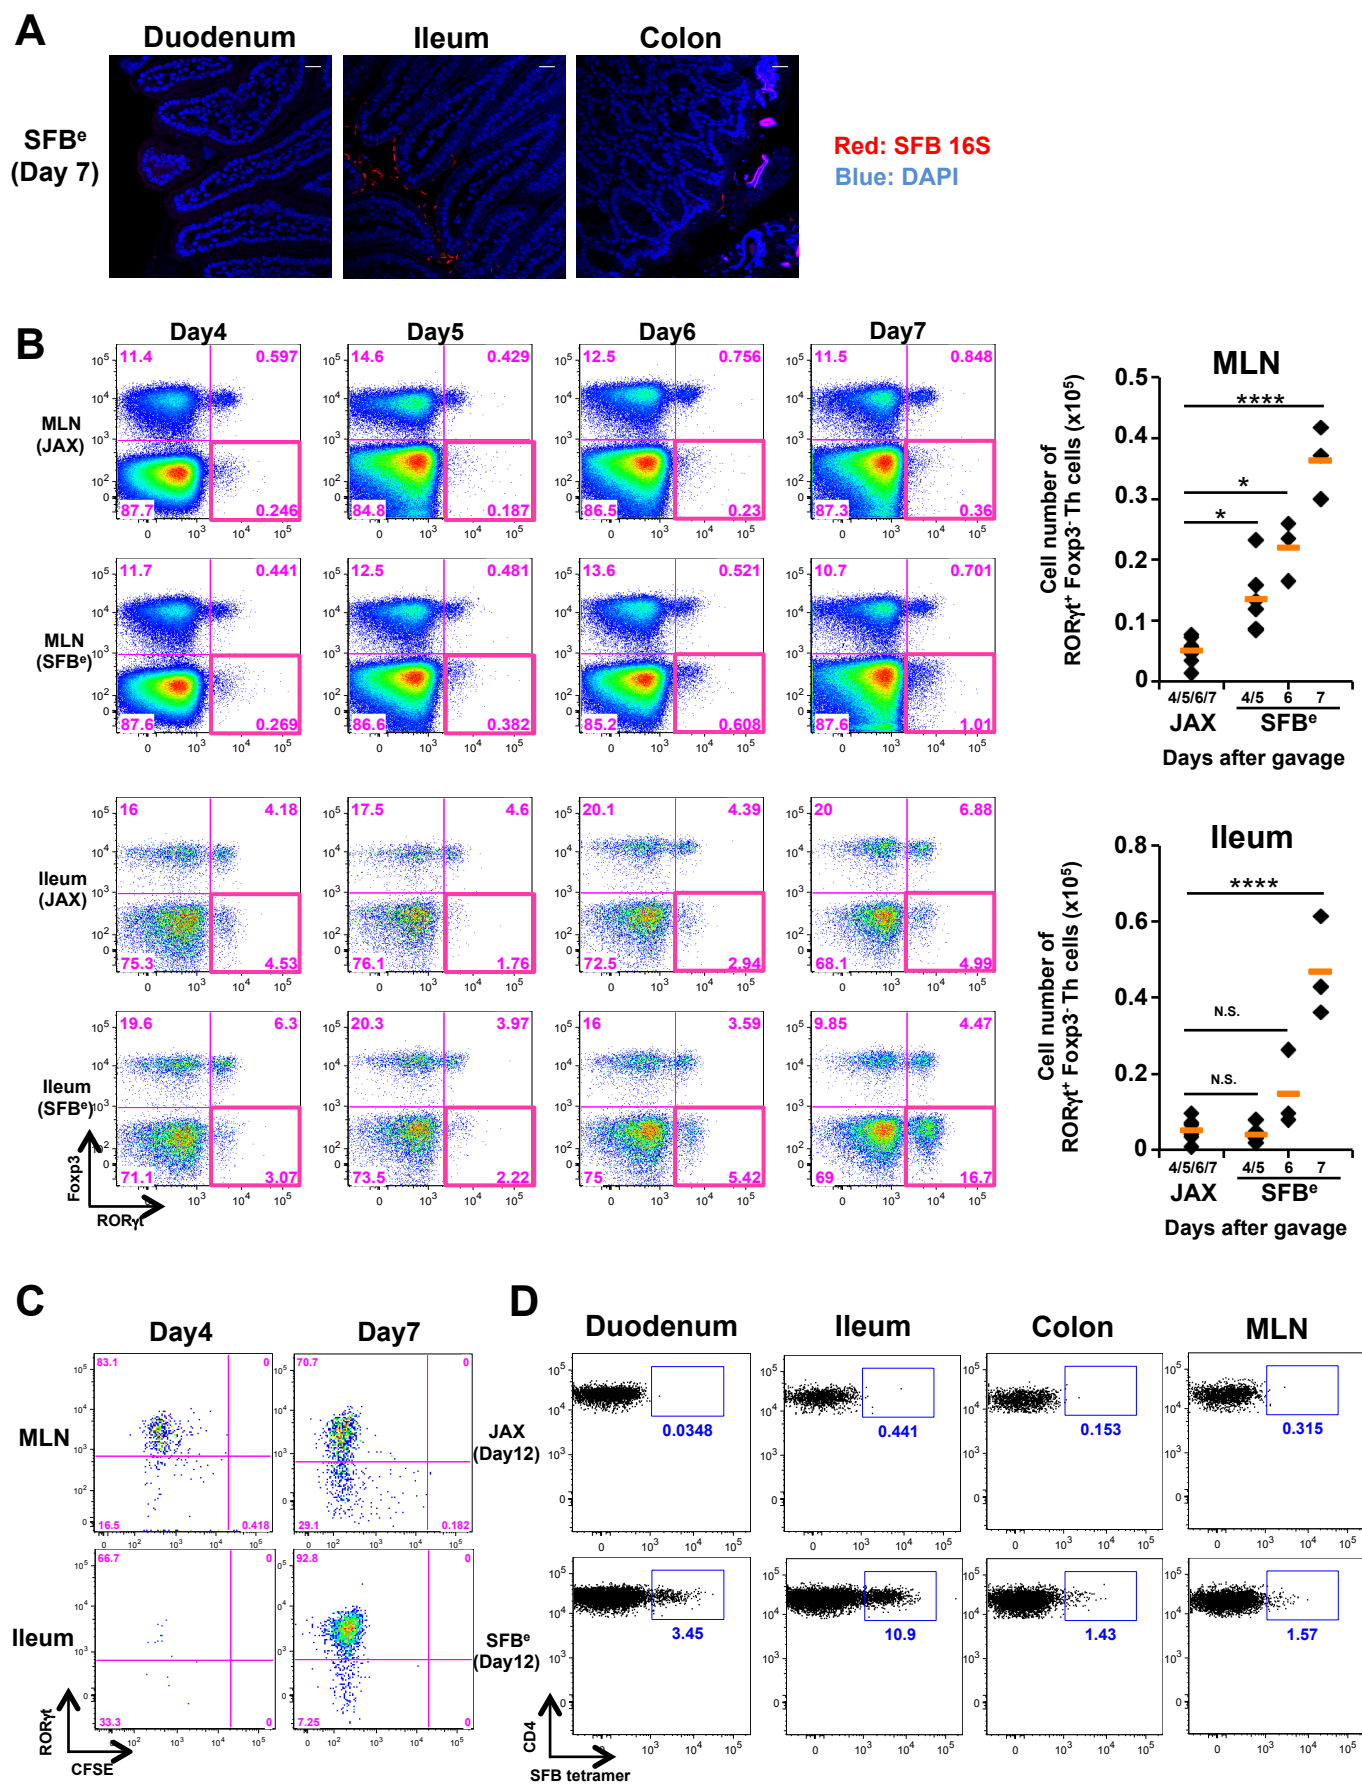

Supplement: NIHMS725831-supplement-1.pdf [file NIHMS725831-supplement-1.pdf]

**Figure S2 (Related Figure 2)**

**A**

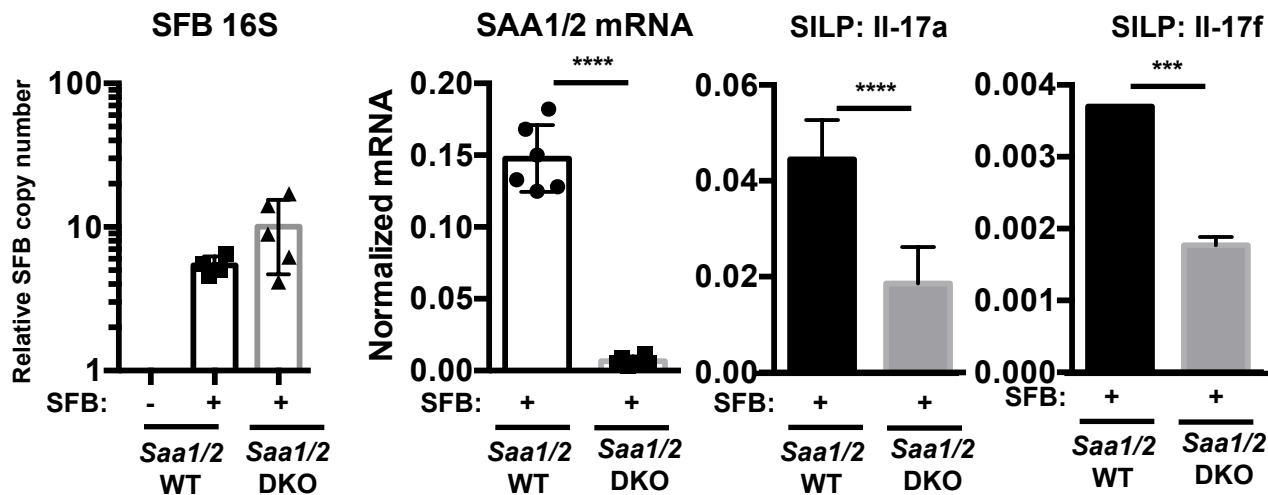

**B**

SILP: Day 7 Reporter

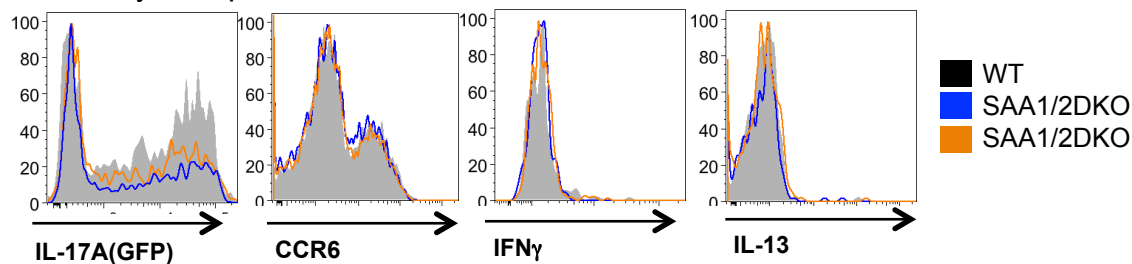

**C**

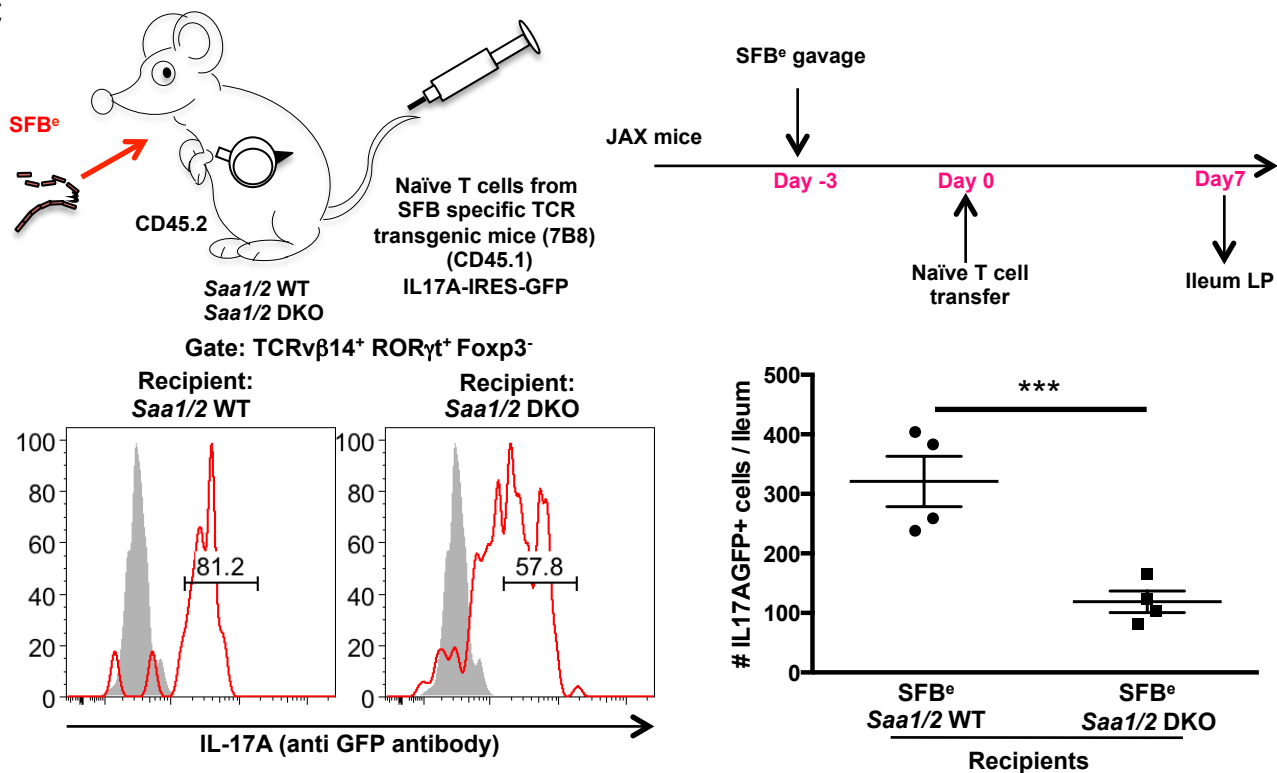

Supplement: NIHMS725831-supplement-2.pdf [file NIHMS725831-supplement-2.pdf]

**Figure S3 (Related Figure 3)**

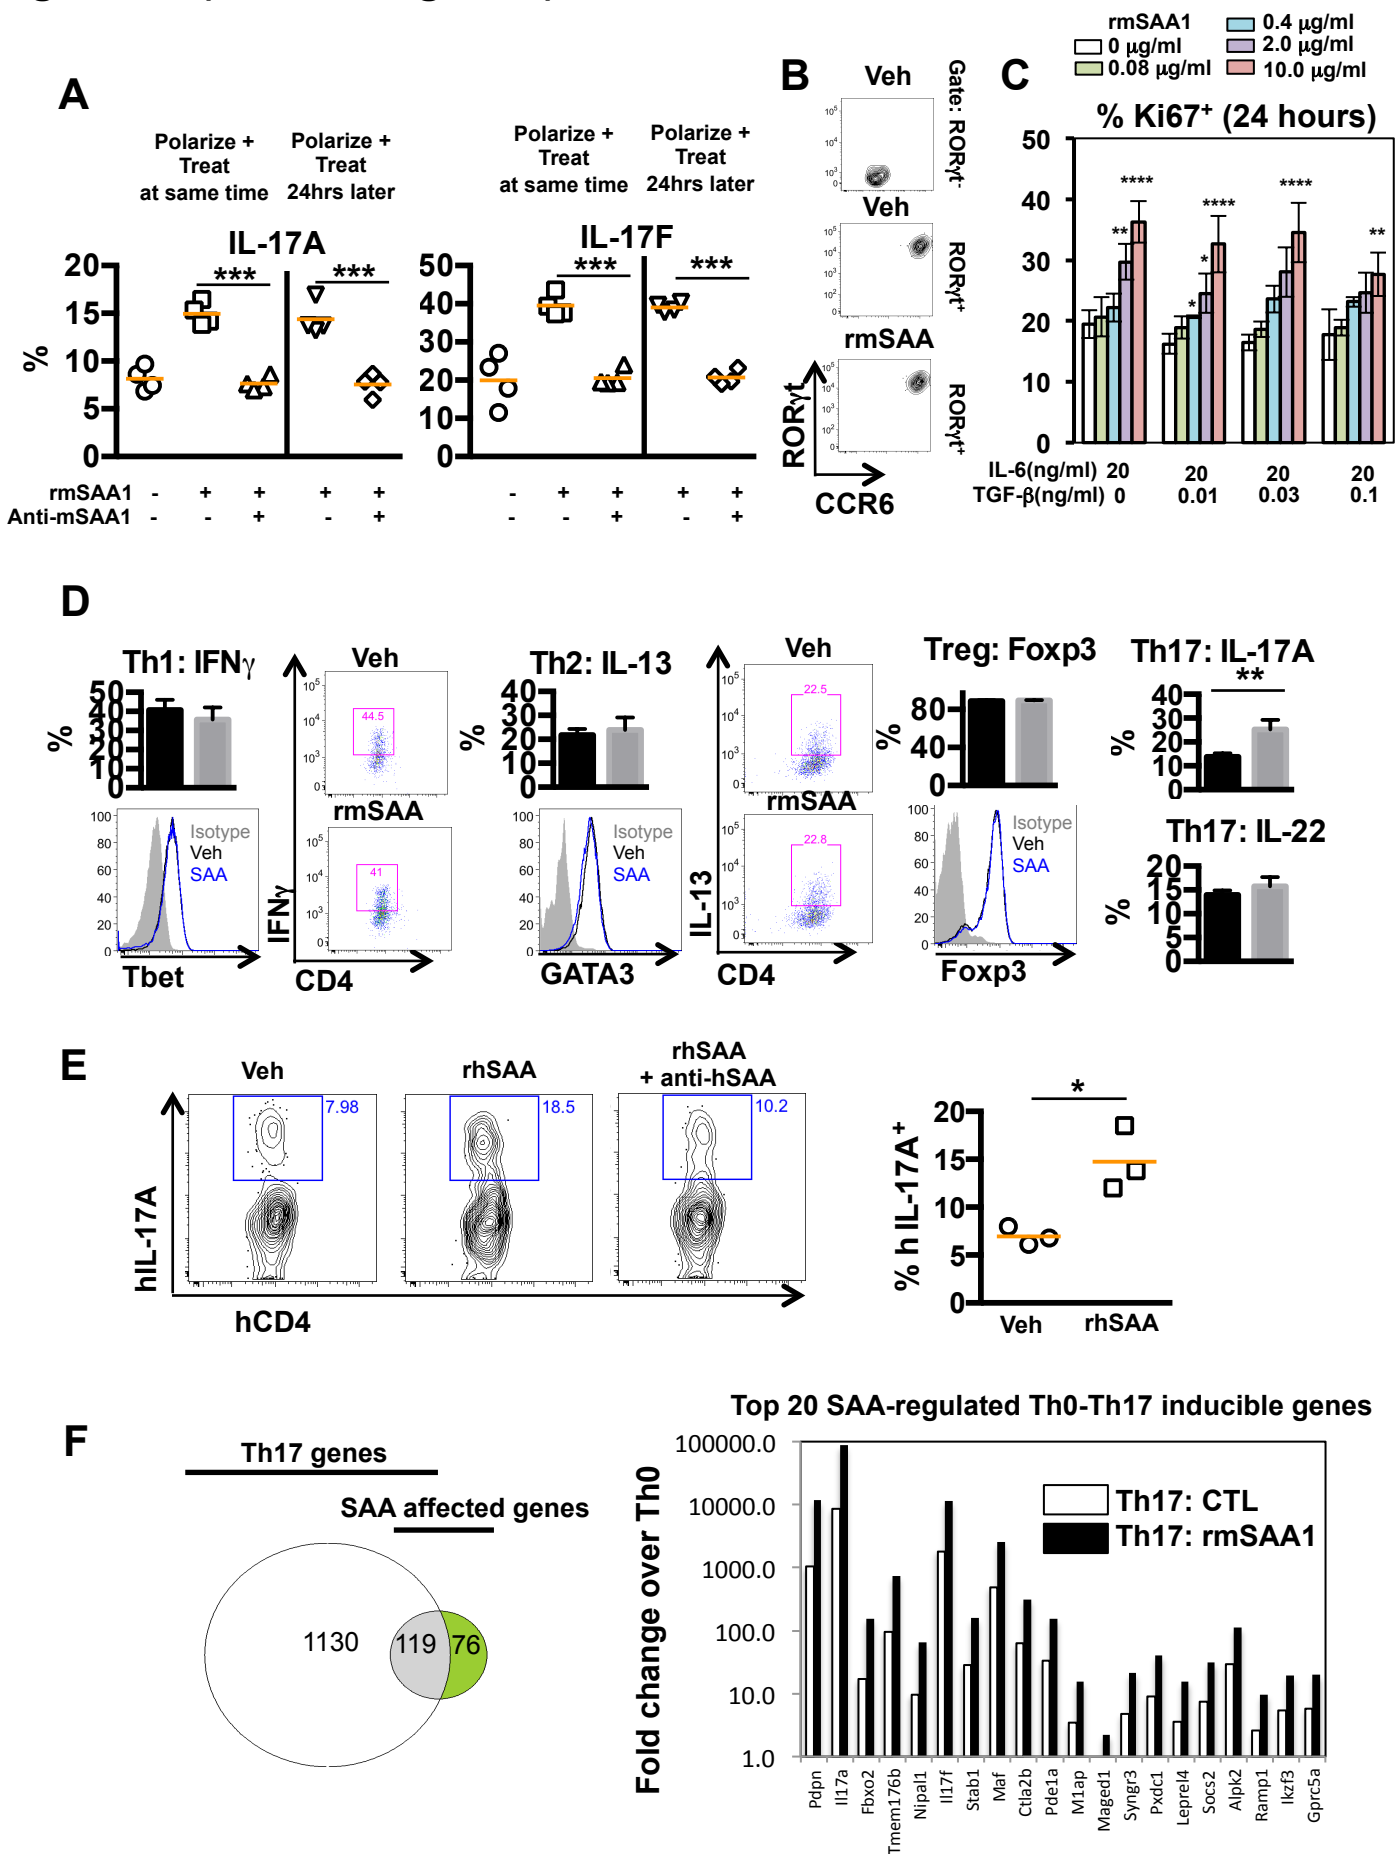

Supplement: NIHMS725831-supplement-3.pdf [file NIHMS725831-supplement-3.pdf]

# Figure S5 (Related Figure 5)

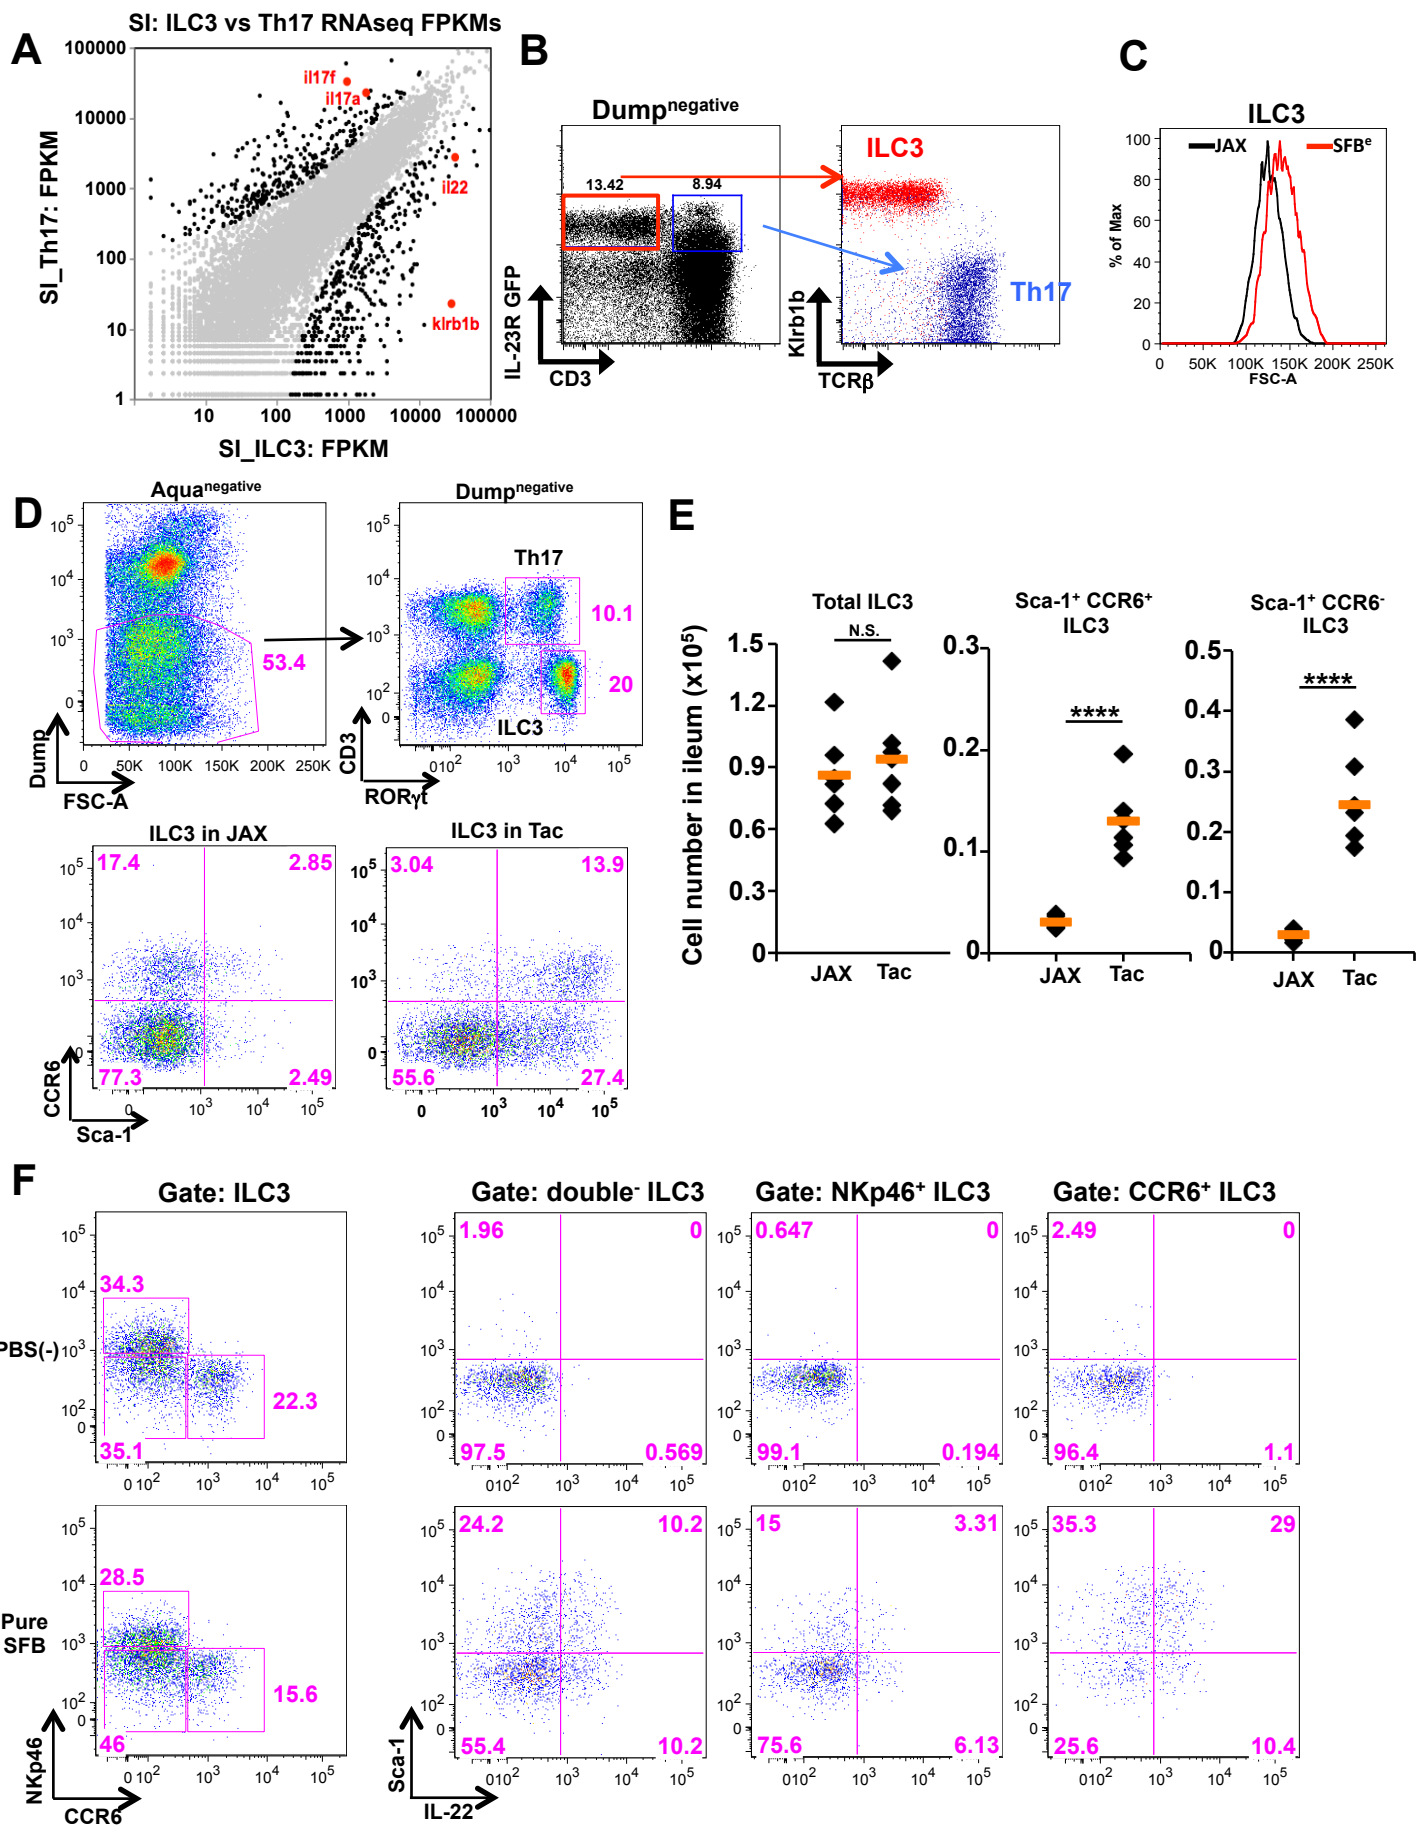

Supplement: NIHMS725831-supplement-5.pdf [file NIHMS725831-supplement-5.pdf]

Figure S6 (Related Figure 1-6)

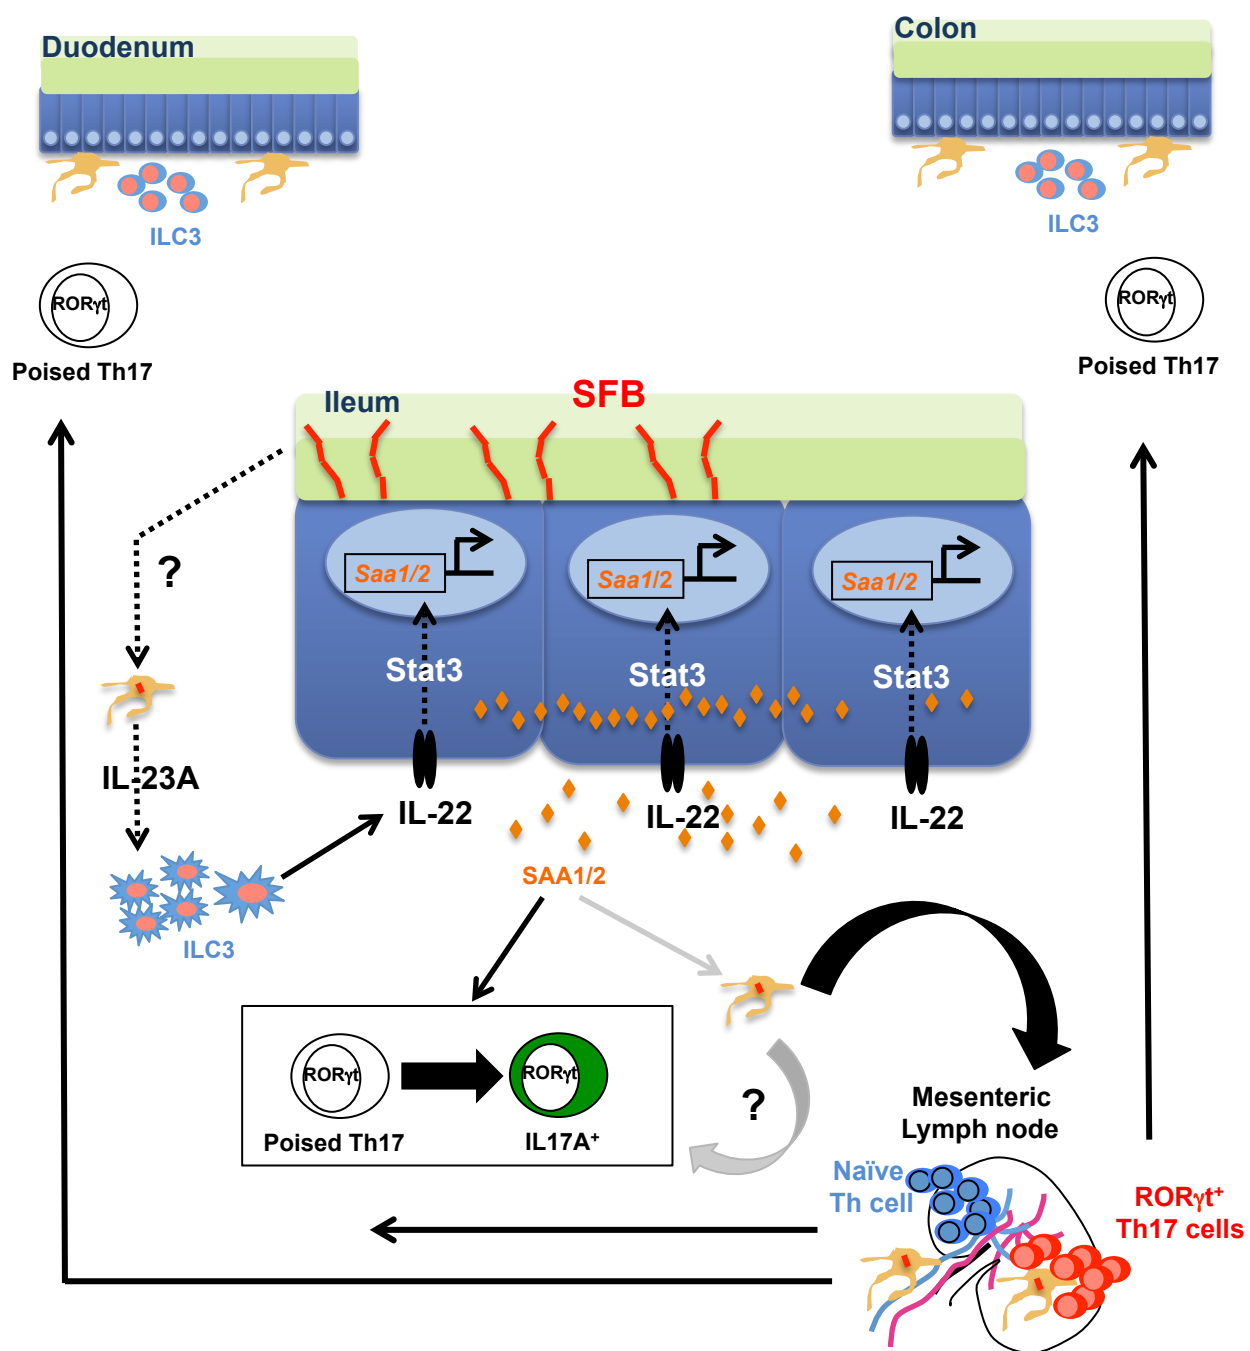

Supplement: NIHMS725831-supplement-6.pdf [file NIHMS725831-supplement-6.pdf]
